# Supplementary material for: In Situ Measurement of Stemflow, Throughfall and Canopy Interception of Sprinkler Irrigation Water in a Wheat Field
Source: MDPI journal article supplement (doi:10.3390/agriculture12081265), 2022-08-19
Supplement: s1 [file s1]

## Supplementary Materials

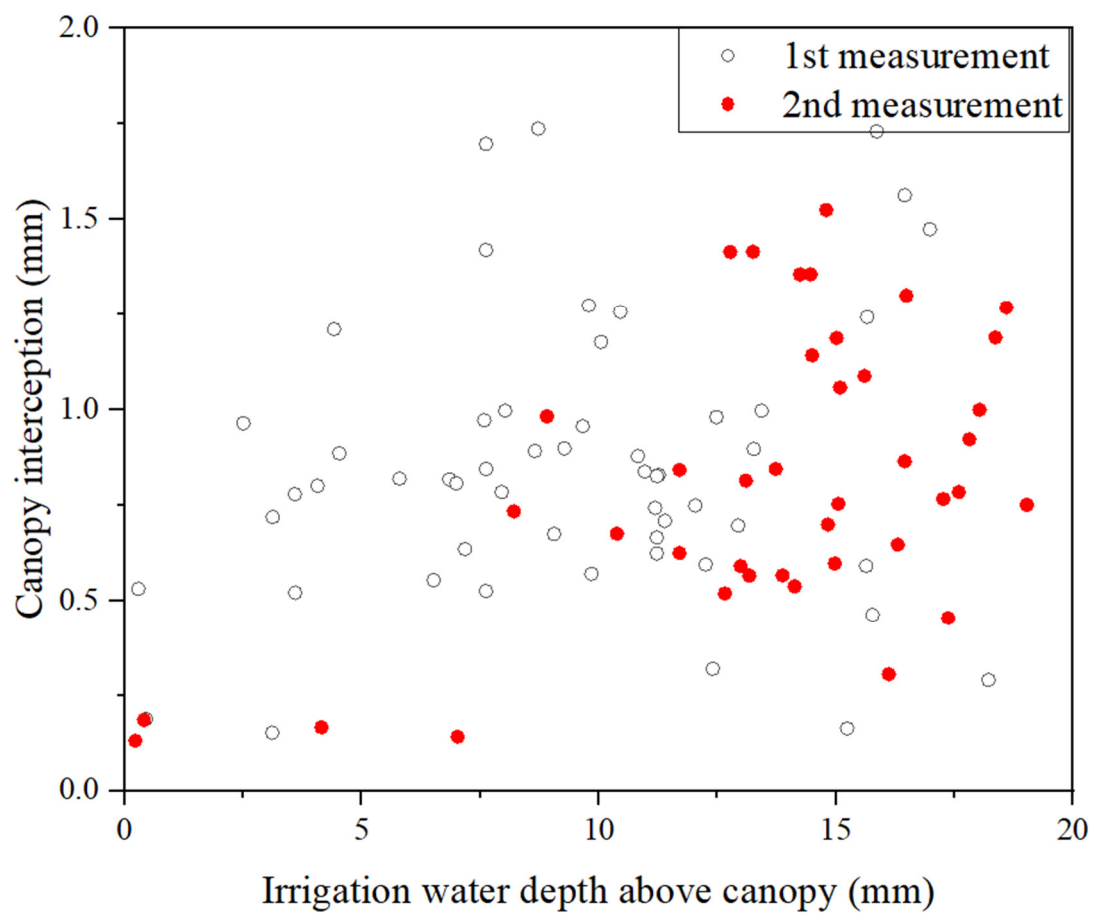

**Figure S1.** Canopy interception water and the corresponding irrigation water depth above the canopy at the same site in the first and second measurements.

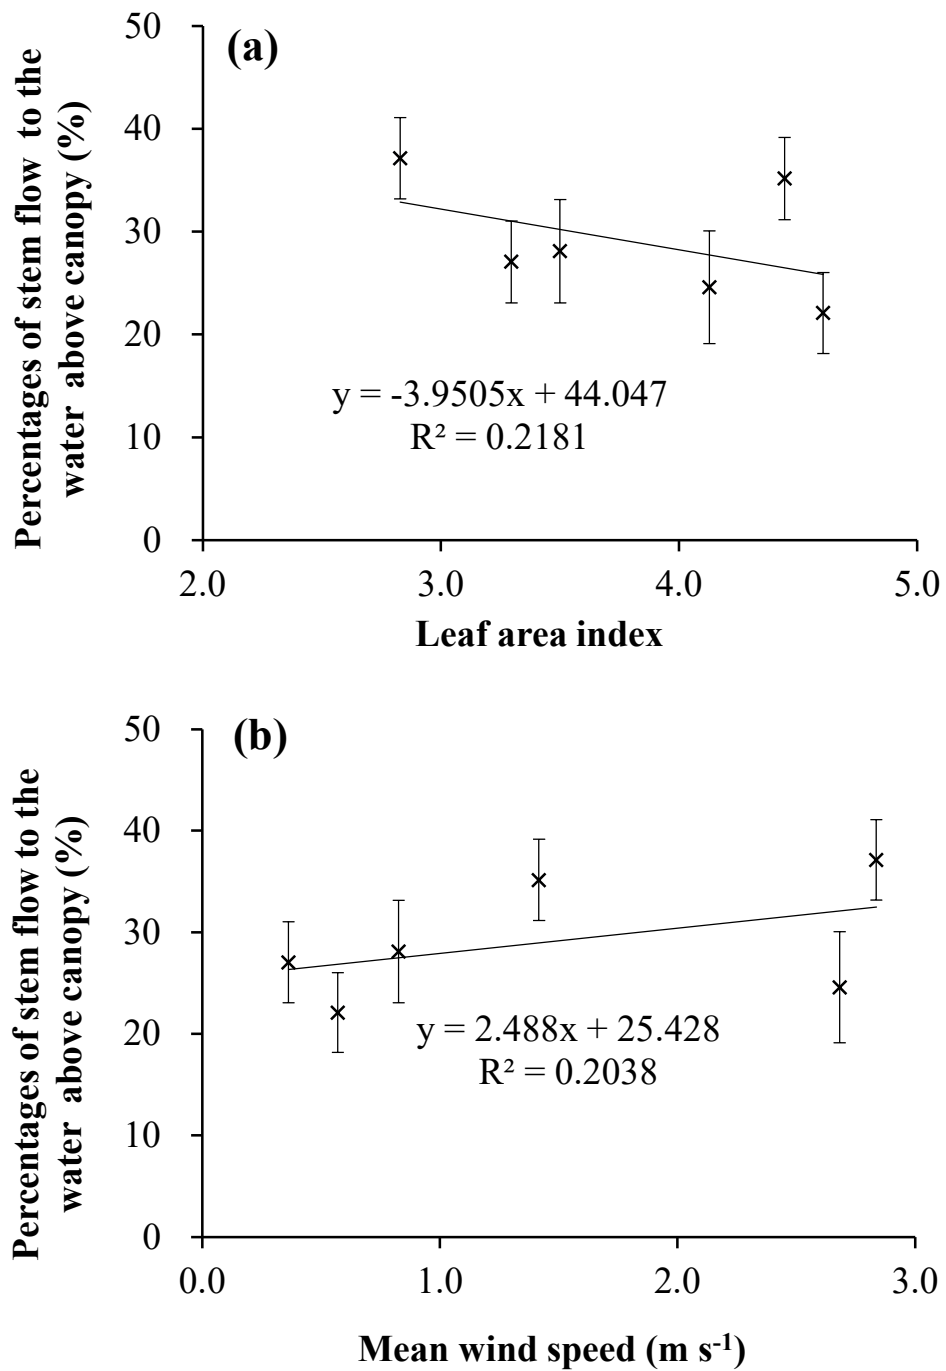

**Figure S2.** Relationships between stemflow water percentage and leaf area index (a) and wind speed during measurement (b).

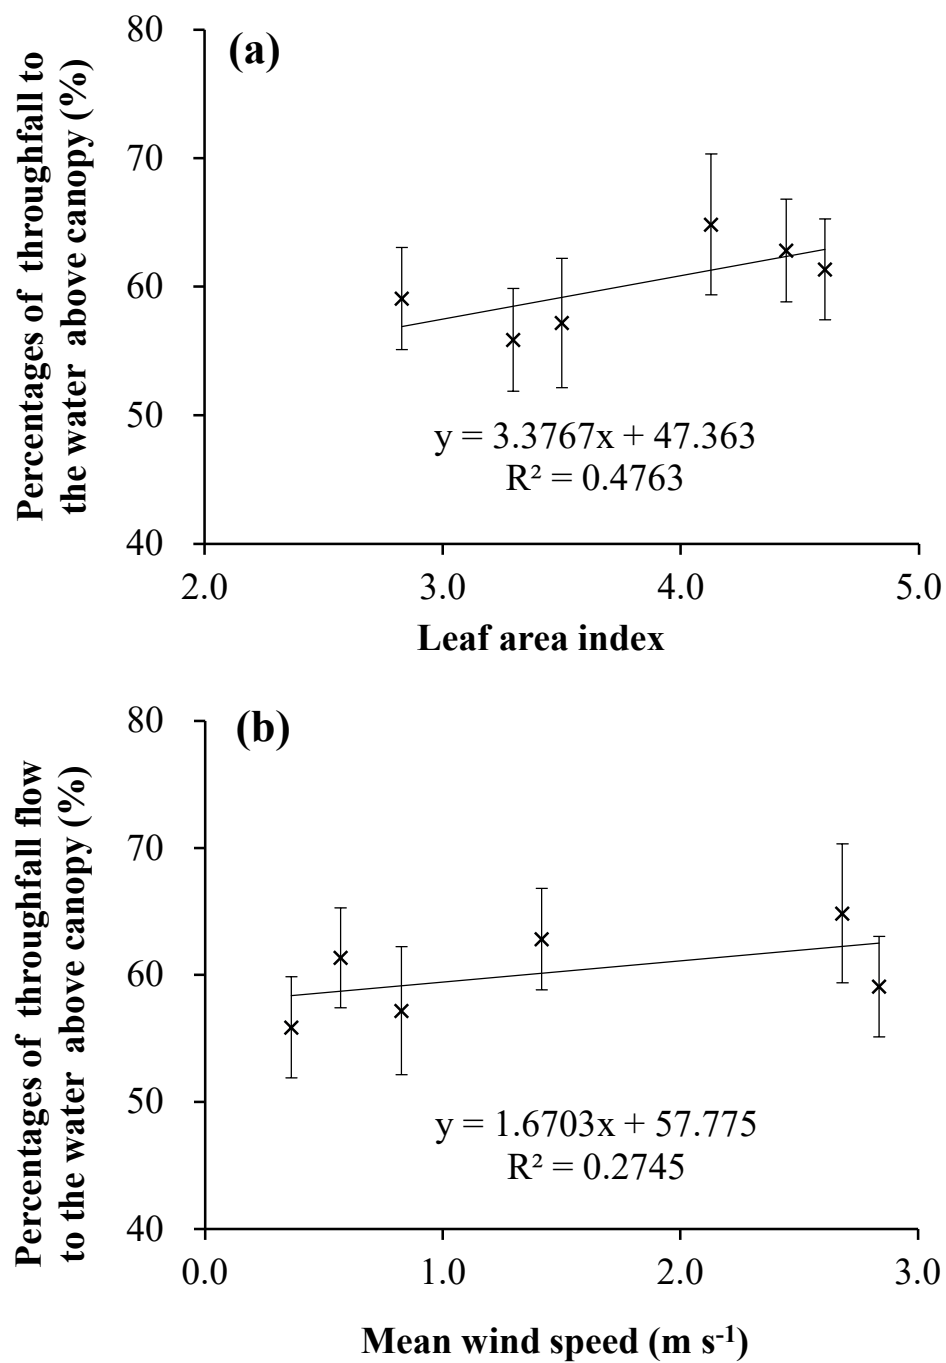

**Figure S3.** Relationships between throughfall water percentage to leaf area index (a) and wind speed during measurement (b).
